# Supplementary material
Source: PubMed Central journal article supplement (PMC7745096)
Supplement: 40820_2016_102_MOESM1_ESM.pdf [file 40820_2016_102_MOESM1_ESM.pdf]

Supporting Information for

## Controllable Biosynthesis and Properties of Gold Nanoplates Using Yeast Extract

Zhi Yang<sup>1,\*</sup>, Zhaohui Li<sup>1</sup>, Xuxing Lu<sup>2</sup>, Fengjiao He<sup>1</sup>, Xingzhong Zhu<sup>1</sup>, Yujie Ma<sup>1</sup>, Rong He<sup>1</sup>, Feng Gao<sup>1</sup>, Weihai Ni<sup>2,\*</sup>, Yasha Yi<sup>3,\*</sup>

<sup>1</sup>Key Laboratory for Thin Film and Microfabrication of Ministry of Education, Department of Micro/Nano Electronics, School of Electronic Information and Electrical Engineering, Shanghai Jiao Tong University, Shanghai 200240, People's Republic of China

<sup>2</sup>Division of i-Lab, Key Laboratory of Nano-Bio Interface & Collaborative Innovation Center of Suzhou Nano Science and Technology, Suzhou Institute of Nano-Tech and Nano-Bionics, Chinese Academy of Sciences, Suzhou, Jiangsu 215123, People's Republic of China

<sup>3</sup>Integrated Nano Optoelectronics Laboratory, Department of Electrical and Computer Engineering, University of Michigan, Dearborn, MI 48128, USA & Energy Institute, University of Michigan, Ann Arbor, MI 48109

\*Corresponding authors. E-mail: zhiyang@sjtu.edu.cn, whni2012@sinano.ac.cn, yashayi@umich.edu  
Tel.: +86-21-34206398, Fax: +86-21-34205665

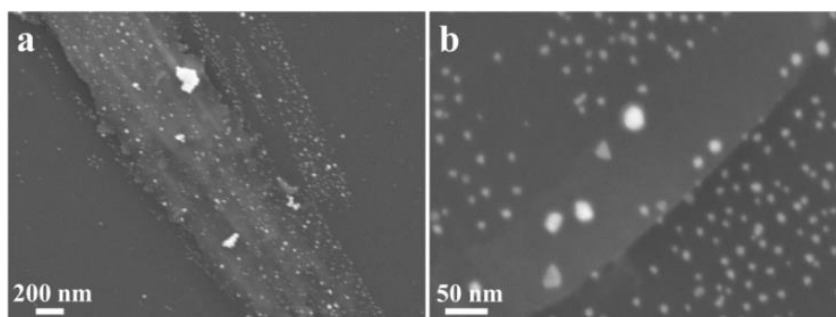

**Fig. S1** At the first stage of the synthesis in the acid condition, only small nanoparticles were synthesized, without any nanoplates.

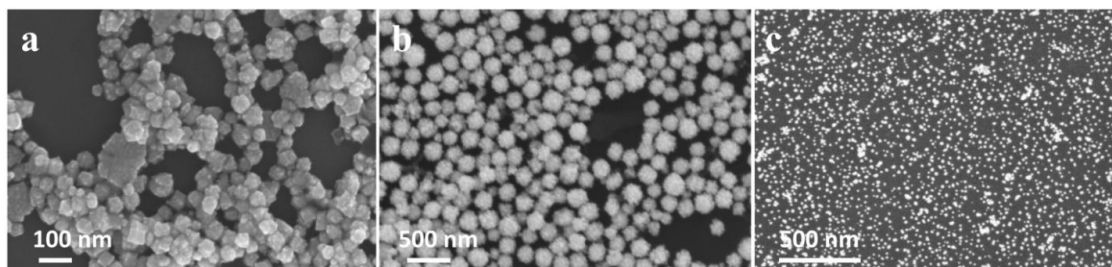

**Fig. S2** SEM images of gold nanostructures synthesized at the pH values of 5.0 (a), 7.0 (b), and 10.0 (c). A mixture of plates and nanoflowers is acquired under the acid condition. In the neutral and base condition, the products come out to be nanoflowers and nanoparticles, respectively.

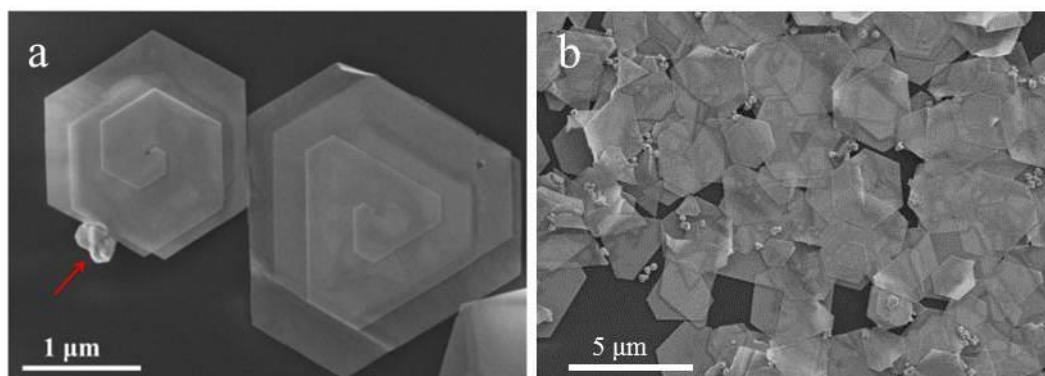

**Fig. S3** SEM images show nanoparticles change their morphology along with the growth of spiral plates, which grow together and expose crystal planes of low interface energy.

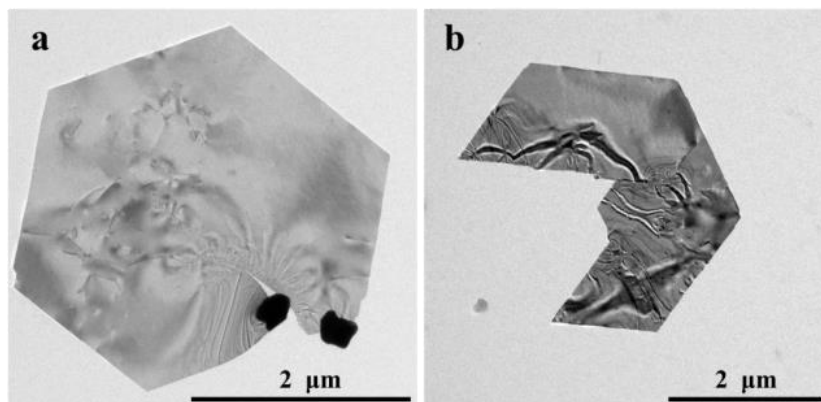

**Fig. S4** TEM images of gold plates cracked, as a support of high surface tension.

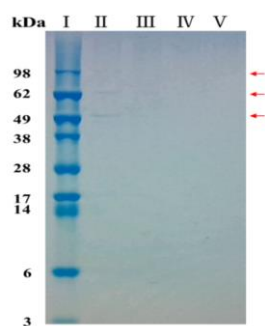

**Fig. S5** Pre-stained protein standards sodium dodecyl sulfate polyacrylamide gel electrophoresis (SDS-PAGE) analysis of yeast medium extract of different second step concentration and heat process; with a second step centrifugation at 3000 rpm (line II), 8000 rpm (line III); with a second step centrifugation at 3000 rpm (line IV) or 8000 rpm (line V), 0.5 h's boiling and the third step of centrifugation at 8000 rpm. Line I shows standard protein molecular weight markers with molecular weights in kDa. At the first low speed step, yeast cells were precipitated and prevented from cell rupture, while at the second high speed step, hypha and cell debris were centrifuged as sedimentation.

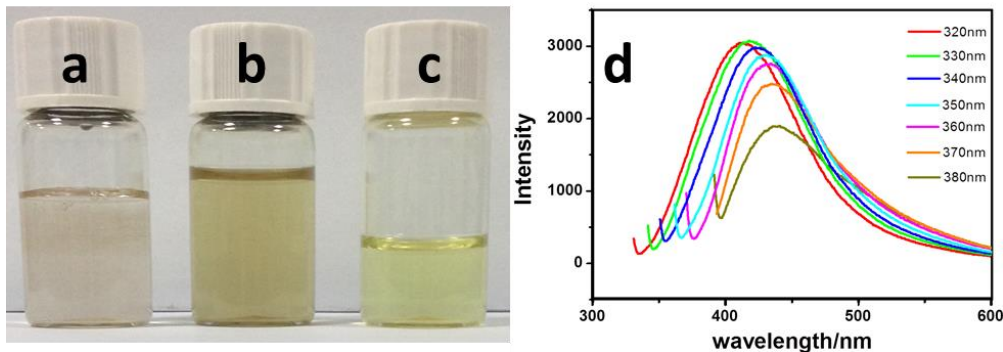

**Fig. S6** Photo of plates in deionized water (a), plates re-dispersed in NaOH (b), and gold nanoclusters in base condition (c). Gold nanocluster solution was the supernatant of solution b going through a centrifugation at 10,000 rpm for 10 min; the corresponding photoluminescence spectra of nanoclusters recorded for progressively longer excitation wavelengths from 320 to 380 nm in a 10 nm increment (d).

**Table S1** Amino acid analysis (AAA) of yeast medium abstract. 25 kinds of amino acids are detected, among which glutamic acid (Glu), amino n-butyric acid (a-ABA), and asparagine (AspNH<sub>2</sub>) are the most ones. Especially, the glutamic acid, as the nitrogen source, has the concentration an order of magnitude higher than other materials.

| Name               | Area   | Resolution | Mol concentration (nmol mL <sup>-1</sup> ) | CalcMol (ng mL <sup>-1</sup> ) |
|--------------------|--------|------------|--------------------------------------------|--------------------------------|
| Asp                | 345417 | 1.41       | 9.392                                      | 1250.067                       |
| Thr                | 29462  | 6.51       | 0.763                                      | 90.839                         |
| Ser                | 52056  | 1.84       | 1.36                                       | 142.897                        |
| AspNH <sub>2</sub> | 27704  | 3.33       | 2.034                                      | 268.637                        |
| Glu                | 857271 | 1.68       | 20.706                                     | 3045.919                       |
| GluNH <sub>2</sub> | 46327  | 1.38       | 1.858                                      | 271.621                        |
| Gly                | 82343  | 13.91      | 2.073                                      | 155.648                        |
| Ala                | 521032 | 1.88       | 13.293                                     | 1184.434                       |
| Val                | 120456 | 6.54       | 3.058                                      | 358.062                        |
| g-ABA              | 183718 | 29.27      | 4.804                                      | 495.293                        |
| Hyllys             | 14688  | 27.36      | 0.422                                      | 68.462                         |
| Orn                | 61505  | 7          | 1.445                                      | 190.984                        |
| Arg                | 63316  | 20.71      | 1.782                                      | 310.458                        |

**Table S2** Peaks changed in the FT-IR spectrum of yeast medium extract before and after the bioreduction. Weakened peaks means the corresponding bonds becomes less; strengthened peaks means the corresponding bonds accumulate in the redox reaction.

| Peaks (before reaction) | Peaks (after reaction) | Strengthen or Weaken | Corresponding bonds | Chemical Compound |
|-------------------------|------------------------|----------------------|---------------------|-------------------|
| 674                     | 682                    | Weaken               | N-H                 | Amine             |
| 1064                    | 1069                   | Severely weaken      | N-H                 | Amine             |
| 1407                    | 1407                   | Weaken               | N-H                 | Amine             |
| 1604                    | 1571                   | Strengthen           | N-H                 | Free amino acid   |
| 2931                    | 2950                   | Weaken               | N-H                 | Free amino acid   |
| 3377                    | 3377                   | Weaken               | N-H or O-H          | Amine or sugar    |
